# Supplementary material
Source: PubMed Central journal article supplement (PMC5526736)
Supplement: NIHMS855845-supplement-1.pdf [file NIHMS855845-supplement-1.pdf]

**Table S1: Microscopy scoring system**

| <b>Score</b> | <b>Description</b>                                                                                                                       |
|--------------|------------------------------------------------------------------------------------------------------------------------------------------|
| <b>1</b>     | <b>RTEC 0 and granular casts 0</b>                                                                                                       |
| <b>2</b>     | <b>RTEC 0 and granular casts 1 to 5<br/>or<br/>RTEC 1 to 5 and granular casts 0</b>                                                      |
| <b>3</b>     | <b>RTEC 1 to 5 and granular casts 1 to 5.<br/>or<br/>RTEC 0 and granular casts 6 to 10<br/>or<br/>RTEC 6 to 20 and granular casts 0.</b> |

RTEC, renal tubule epithelial cells.

This table is adopted from Perazella MA, Coca SG, Kanbay M. Diagnostic value of urine microscopy for differential diagnosis of acute kidney injury in hospitalized patients. *Clin J Am Soc Nephrol*, 2008; 3(6): 1615-1619
